# Supplementary material for: The Prognostic Value of Olfactory Dysfunction in Patients with COVID-19: The COVIDORA Study
Source: MDPI journal article supplement (doi:10.3390/life14030293), 2024-02-22
Supplement: s1 [file s1]

## **THE COVIDORA STUDY**

### **CRF**

#### **INFORMATION FOR THE PATIENT**

**We will ASK YOU QUESTIONS in order to gather information about**

- your medical history**
- your recent symptoms**
- about the quality of your ABILITY TO SMELL AND YOUR TASTE.**

**Answer freely based on your current condition.**

**Take time to think about each question before you give your answer. If you don't understand a question, ask us to explain it to you.**

## IDENTIFICATION PATIENT

**First letter of the last name :** \_\_\_\_

**First letter of the first name:** \_\_\_\_

**Date of birth:** \_\_\_\_ (day) \_\_\_\_ (month) \_\_\_\_ (year)

**Age of the patient on the day of inclusion:** \_\_\_\_ (years)

**Sex:** ☐ Female or ☐ Male

**Date of inclusion:** \_\_\_\_ (day) \_\_\_\_ (month) \_\_\_\_ (year)

**Name of the investigator:**

### FIRST VISIT

**Teleconsultation or face-to-face consultation**  
**(to be carried out within 3 days of a positive COVID-19 diagnosis)**

**Date of the consultation:** \_\_\_\_ (day) \_\_\_\_ (month) \_\_\_\_ (year)

**CENTRE for inclusion = Centre number** \_\_\_\_ (see the list below)?

CENTRE 1= Service ORL Lariboisière (Dr Hautefort),  
 CENTRE 2= Service ORL Henri Mondor (Dr Bartier et Dr Bequignon)  
 CENTRE 3= Service ORL Kremlin Bicêtre (Pr Papon et Dr Nevoux)  
 CENTRE 4= Service ORL La Pitié Salpêtrière (Pr Nguyen)  
 CENTRE 5= Service Maladies Infectieuses, Hôtel Dieu (Pr Salmon)  
 CENTRE 6= Service ORL Centre Hospitalier Intercommunal de créteil (Pr Prulières Escabasse)  
 CENTRE 7= Hôpital Fondation Rotschild (Dr Corré)  
 CENTRE 8 =Service ORL, CHU de Strasbourg (Pr Debry)  
 CENTRE 9 = Service ORL Hospices civiles de Lyon (Pr Tringali)  
 CENTRE 10= Service ORL Hôpital Edouard Herriot-HCL Lyon (Pr Truy)  
 CENTRE 11= Service ORL Chu de Caen (Dr Patron)  
 CENTRE 12= Service ORL CHU Toulouse (Pr Serrano et Dr Debonnecaze)  
 CENTRE 13=Service ORL Institut Arthur Vernes, Paris (Dr Lecanu)  
 CENTRE 14= Service ORL CHU Nantes (Pr Malard)  
 CENTRE 15= Service d'ORL, CHU de La Conception, Marseille (Pr Michel)  
 CENTRE 16= Institut Universitaire de la Face et du Cou, Nice (Dr Vandersteen)  
 CENTRE 17= Service ORL Hôpital Saint-Philibert GHICL (Dr E Bartaire)  
 CENTRE 18 =Service ORL Hôpital Saint-Vincent de Paul GHICL / Faculté Libre de Médecine de Lille (Dr Deraedt)  
 CENTRE 19= Service ORL et chirurgie cervico-faciale CHU de Clermont-Ferrand (Dr Saroul)  
 CENTRE 20 = Service ORL, CHRU Nancy (Dr Rumeau)  
 CENTRE 21= Service ORL, CHU de Poitiers (Pr Dufour et Dr Carsuzaa)  
 CENTRE 22= Service ORL, Hôpital FOCH, Suresnes (Pr Hans)  
 CENTRE 23= Service ORL, CHU de Bordeaux, (Pr De Gabory)  
 CENTRE 24= Service ORL, Cochin (Dr Lacroix)

## ACTUAL SITUATION

*First of all, where is the patient on the date of Visit 1?*

At home 0    At home with oxygen 1    Medical unit 2    ICU 3    Deceased 4

- At home ☐
- At home with oxygen ☐
- Hospitalized in Medical unit with oxygen ☐
- Hospitalized in ICU ☐
- The patient is deceased ☐

If death, under what circumstances? .....

## CARACTERISTIQUES EPIDEMIOLOGIQUES

### Weight and Height

Weight |\_|\_| kg    Height |\_|, |\_|\_| m    MBI |\_|\_|, |\_| kg/m<sup>2</sup>

### Profession

.....

### Tabacco

**Do you smoke or have you ever been a smoker ?**    ☐ yes    ☐ no

Current : 0 no 1 yes    Consumption : |\_|\_|\_|

weaned : 0 no 1 yes    Number of years of weaning: |\_|\_|\_|

### General history

0 non 1 oui

○ Allergies

- **Do you have any known allergies?**    ☐ yes    ☐ no
- If the answer is yes, which ones: .....

○ Chronic illness

- **Do you have a history of immunosuppression?**    ☐ yes    ☐ no
- **Do you have a history of chronic illness?**    ☐ yes    ☐ no
- If the answer is yes, which ones:
  - ☐ Diabetes                      ☐ Hypertension            ☐ Neoplasia: .....
  - ☐ Renal insufficiency    ☐ Inflammatory or degenerative neurological pathology
- **Do you have a history of autoimmune disease (lupus, polyarthritis) ?**    ☐ yes    ☐ no

**ENT history**Do you have an ENT history? ☐ yes ☐ no○ Rhinological history

- If the answer is yes, which ones:

☐ **Allergic rhinitis:** 0 no 1 proven 2 suspected 3 NA

If the answer is yes, which allergen is involved (mite, pollen?) .....

*If allergic to pollens :* do you think you have started your seasonal allergy attack (appearance of your usual symptoms?) 0 no 1 yes

☐ **Chronic rhinosinusitis without polyps:** 0 no 1 yes

☐ **Chronic rhinosinusitis with polyps** 0 no 1 yes

☐ **Radiotherapy covering the head area :** 0 no 1 yes

☐ **Chemotherapy :** 0 no 1 yes
○ History of anosmia (complete loss of smell)

Do you have a history of complete loss of smell (anosmia) ? 0 no 1 yes

If the answer is yes, are the symptoms old and permanent (older than 3 months)? 0 no 1 yes

○ History of head trauma

Do you have a history of severe head trauma?

- 0 no 1 yes

**Medication**

0 non 1 oui

Are you taking any medication (including nasal spray) ? 0 no 1 yes

If the answer is yes, which ones: .....

**CLINICAL FEATURES****Date of onset of first COVID symptoms**

When did you first experience symptoms attributable to COVID-19? \_\_\_\_/\_\_\_\_/\_\_\_\_

**Olfaction disorders**

Do you have a sense of smell disorder. (Do you have difficulty smelling odors?). 0 no 1 yes

|                                                                                                                      |                                                                         |
|----------------------------------------------------------------------------------------------------------------------|-------------------------------------------------------------------------|
| <b>If the answer is yes, when did it start?</b>                                                                      | ____/____/____                                                          |
| <u>Onset of the symptom</u><br>0 gradually 1 suddenly<br><b>Did the smell problems appear gradually or suddenly?</b> | <input type="checkbox"/> Gradually<br><input type="checkbox"/> Suddenly |

|                                                                                                                                                                                                                                                                                                                                                                                             |                                                                                                                                                                                                                                                                                                          |
|---------------------------------------------------------------------------------------------------------------------------------------------------------------------------------------------------------------------------------------------------------------------------------------------------------------------------------------------------------------------------------------------|----------------------------------------------------------------------------------------------------------------------------------------------------------------------------------------------------------------------------------------------------------------------------------------------------------|
| <u>Inaugural nature of the symptom</u><br>0 no                      1 yes<br><b>Were the problems with your sense of smell the first of your symptoms in isolation?</b><br><b>If the answer is no, has it been:</b><br>- Concomitant with other symptoms?<br>- Preceded by classical symptoms of COVID-19 (fever >38°, cough?)<br>- Preceded by minor symptoms (fatigue, aches, headaches?) | <input type="checkbox"/> Yes <input type="checkbox"/> No<br><br><input type="checkbox"/> Yes <input type="checkbox"/> No<br><input type="checkbox"/> Yes <input type="checkbox"/> No<br><input type="checkbox"/> Yes <input type="checkbox"/> No                                                         |
| <u>Quantitative dysosmia</u><br>1 partial (= hyposmia)<br>2 total (= anosmia)<br><b>Is your loss of smell partial or total?</b>                                                                                                                                                                                                                                                             | <input type="checkbox"/> Partial <input type="checkbox"/> Total                                                                                                                                                                                                                                          |
| <u>Parosmia</u><br>0 no                      1 yes<br><b>Did you ever perceive a smell that did not correspond to the olfactory stimulation? (For example, coffee smells like burnt rubber)</b>                                                                                                                                                                                             | <input type="checkbox"/> Yes <input type="checkbox"/> No                                                                                                                                                                                                                                                 |
| <u>Phantosmia</u><br>0 no                      1 yes<br><b>Have you ever perceived a smell without any olfactory stimulation?</b>                                                                                                                                                                                                                                                           | <input type="checkbox"/> Yes <input type="checkbox"/> No                                                                                                                                                                                                                                                 |
| <b>Can you accurately smell the scent of:</b><br>0 no                      1 yes<br>• Cinnamon ?<br>• Cumin ?<br>• Cloves ?<br>• Vanilla ?<br>• Vinegar ?                                                                                                                                                                                                                                   | <input type="checkbox"/> Yes <input type="checkbox"/> No<br><input type="checkbox"/> Yes <input type="checkbox"/> No |

### Evolution of the olfaction disorder

How long has your loss of smell been evolving in days ?.....

### Rhinological symptoms

|                                                                                                                                                                                                                                               |                                                                                                                                                                                                                                              |
|-----------------------------------------------------------------------------------------------------------------------------------------------------------------------------------------------------------------------------------------------|----------------------------------------------------------------------------------------------------------------------------------------------------------------------------------------------------------------------------------------------|
| <u>Rhinorrhea</u><br><b>If yes, concomitant to the smell disorder?</b><br>0 no                      1 yes<br><b>Did you have a runny nose?</b><br>0 no                      1 yes<br><b>If so, was it concomitant with the loss of smell?</b> | <input type="checkbox"/> Yes <input type="checkbox"/> No<br><input type="checkbox"/> Yes <input type="checkbox"/> No<br><input type="checkbox"/> Yes <input type="checkbox"/> No<br><input type="checkbox"/> Yes <input type="checkbox"/> No |
| <u>Nasal obstruction</u><br>0 no                      1 yes<br><b>Did you have the feeling that your nose was completely blocked?</b>                                                                                                         | <input type="checkbox"/> Yes <input type="checkbox"/> No                                                                                                                                                                                     |
| <u>Nasal hyperreactivity</u><br>0 no                      1 yes<br><b>Did you have an itchy nose with the urge to sneeze +/- sneezing?</b>                                                                                                    | <input type="checkbox"/> Yes <input type="checkbox"/> No                                                                                                                                                                                     |

|                                                                                                                                                           |                                                                            |
|-----------------------------------------------------------------------------------------------------------------------------------------------------------|----------------------------------------------------------------------------|
| <u>Nasal paresthesia (burning sensation, intranasal pain)</u><br><b>Did you experience a sensation of burning nose, tingling, pain?</b>                   | <input type="checkbox"/> Yes <input type="checkbox"/> No                   |
| <u>Other symptoms</u><br>0 no                      1 yes<br><b>Did you experience any other rhinologic symptoms?</b><br>If the answer is yes, which ones: | <input type="checkbox"/> Yes <input type="checkbox"/> No<br>.....<br>..... |

### Taste disorder

|                                                                                                                                                                                                                           |                                                                                                                                                                                                                                              |
|---------------------------------------------------------------------------------------------------------------------------------------------------------------------------------------------------------------------------|----------------------------------------------------------------------------------------------------------------------------------------------------------------------------------------------------------------------------------------------|
| <u>Dysgueusia</u><br>0 no                      1 yes<br><b>Did you experience a taste disorder?</b><br><b>If the answer is yes:</b><br>- Was it about the flavors of the food?<br>- Was it about salty/sweet/bitter/sour? | <input type="checkbox"/> Yes <input type="checkbox"/> No<br><br><input type="checkbox"/> Yes <input type="checkbox"/> No<br><input type="checkbox"/> Yes <input type="checkbox"/> No                                                         |
| <b>Can you recognize:</b><br>0 no                      1 yes<br>• Salty taste ?<br>• Sweet taste ?<br>• Bitter taste ?<br>• Acidic taste ?                                                                                | <input type="checkbox"/> Yes <input type="checkbox"/> No<br><input type="checkbox"/> Yes <input type="checkbox"/> No<br><input type="checkbox"/> Yes <input type="checkbox"/> No<br><input type="checkbox"/> Yes <input type="checkbox"/> No |

### Other symptoms of COVID-19

Did you experience: ....? 0 no                      1 yes

|                                                                                                                                                                                                                    |                                                                                                                                                                                                                                                                                                                                                                                                                                                                                              |                                                                                                                                                                                                                                                         |                                                                                                                                                                                                                                                                                                                                                                                                                                                                                                                                         |
|--------------------------------------------------------------------------------------------------------------------------------------------------------------------------------------------------------------------|----------------------------------------------------------------------------------------------------------------------------------------------------------------------------------------------------------------------------------------------------------------------------------------------------------------------------------------------------------------------------------------------------------------------------------------------------------------------------------------------|---------------------------------------------------------------------------------------------------------------------------------------------------------------------------------------------------------------------------------------------------------|-----------------------------------------------------------------------------------------------------------------------------------------------------------------------------------------------------------------------------------------------------------------------------------------------------------------------------------------------------------------------------------------------------------------------------------------------------------------------------------------------------------------------------------------|
| <ul style="list-style-type: none"> <li>• Fever</li> <li>• Coughing</li> <li>• Headache</li> <li>• Fatigue</li> <li>• Muscle pain</li> <li>• Sore throat</li> <li>• Conjunctivitis</li> <li>• Laryngitis</li> </ul> | <input type="checkbox"/> Yes <input type="checkbox"/> No<br><input type="checkbox"/> Yes <input type="checkbox"/> No | <ul style="list-style-type: none"> <li>• Difficulty breathing (dyspnea?)</li> <li>• Diarrhea</li> <li>• Nausea/vomiting</li> <li>• Dizziness</li> <li>• Chest pain/oppression</li> <li>• Joint pain</li> <li>• Skin rash</li> <li>• Other...</li> </ul> | <input type="checkbox"/> Yes <input type="checkbox"/> No<br><input type="checkbox"/> Yes <input type="checkbox"/> No<br>If the answer is yes, which one : ..... |
|--------------------------------------------------------------------------------------------------------------------------------------------------------------------------------------------------------------------|----------------------------------------------------------------------------------------------------------------------------------------------------------------------------------------------------------------------------------------------------------------------------------------------------------------------------------------------------------------------------------------------------------------------------------------------------------------------------------------------|---------------------------------------------------------------------------------------------------------------------------------------------------------------------------------------------------------------------------------------------------------|-----------------------------------------------------------------------------------------------------------------------------------------------------------------------------------------------------------------------------------------------------------------------------------------------------------------------------------------------------------------------------------------------------------------------------------------------------------------------------------------------------------------------------------------|

**Diagnosis of COVID-19**Contagion

0 no 1 yes

**Have you been in contact with a known case of COVID-19?** ☐ Yes ☐ NoScreening

0 no 1 yes unless otherwise specified

|                                                                                                                                                                                                                                                                                                                                                                                                                                                                                                                                                                                                                              |                                                                                                                                                                                                                                                                                                                                                                                                                                                    |
|------------------------------------------------------------------------------------------------------------------------------------------------------------------------------------------------------------------------------------------------------------------------------------------------------------------------------------------------------------------------------------------------------------------------------------------------------------------------------------------------------------------------------------------------------------------------------------------------------------------------------|----------------------------------------------------------------------------------------------------------------------------------------------------------------------------------------------------------------------------------------------------------------------------------------------------------------------------------------------------------------------------------------------------------------------------------------------------|
| <u>Swab</u> <ul style="list-style-type: none"> <li><b>Have you been swabbed for COVID-19?</b></li> <li><b>If the answer is yes :</b> <ul style="list-style-type: none"> <li>- Nasal or pharyngeal swab (in the throat)</li> <li>- On what date?</li> <li>- What was the test result? 0 negative 1 positive</li> </ul> </li> <li><b>Have you been swabbed a second time for COVID-19?</b></li> <li><b>If the answer is yes :</b> <ul style="list-style-type: none"> <li>- Nasal or pharyngeal swab (in the throat)</li> <li>- On what date?</li> <li>- What was the test result? 0 negative 1 positive</li> </ul> </li> </ul> | <input type="checkbox"/> Yes <input type="checkbox"/> No<br><br><input type="checkbox"/> Nasal <input type="checkbox"/> Throat<br>____/____/____<br><input type="checkbox"/> Negative <input type="checkbox"/> Positive<br><input type="checkbox"/> Yes <input type="checkbox"/> No<br><br><input type="checkbox"/> Nasal <input type="checkbox"/> Throat<br>____/____/____<br><input type="checkbox"/> Negative <input type="checkbox"/> Positive |
| <u>Imaging</u> <ul style="list-style-type: none"> <li><b>Did you have a chest CT-scan?</b></li> <li>- If so, on what date?</li> <li>- What was the result?</li> <li>- If positive, what were the signs suggestive of COVID?</li> </ul>                                                                                                                                                                                                                                                                                                                                                                                       | <input type="checkbox"/> Yes <input type="checkbox"/> No<br><input type="checkbox"/> Negative <input type="checkbox"/> Positive<br>.....                                                                                                                                                                                                                                                                                                           |

**SECOND VISIT****Teleconsultation or face-to-face consultation****(to be carried out between days 7 and 10 of a positive COVID-19 diagnosis)****Date of the consultation:** \_\_\_\_/\_\_\_\_/\_\_\_\_ (jour) \_\_\_\_/\_\_\_\_ (mois) \_\_\_\_/\_\_\_\_/\_\_\_\_ (année)**ACTUAL SITUATION*****First of all, where is the patient on the date of Visit 2 ?***

At home 0 At home with oxygene 1 Medical unit 2 ICU 3 Deceased 4

- At home ☐
- At home with oxygen ☐
- Hospitalized in Medical unit with oxygene ☐
- Hospitalized in ICU ☐
- The patient is deceased ☐

If death, under what circumstances? .....

**Management evolution**

0 no 1 yes unless otherwise specified

- **Have you been hospitalized?**  
If yes, in which type of medical unit?

☐ Yes ☐ No

.....

**Evolution of other symptoms of COVID-19**

Since first visit, did you experience : ? 0 non 1 oui

|                         |                                                          |                                          |                                                          |
|-------------------------|----------------------------------------------------------|------------------------------------------|----------------------------------------------------------|
| • <b>Fever</b>          | <input type="checkbox"/> Yes <input type="checkbox"/> No | • <b>Difficulty breathing (dyspnea?)</b> | <input type="checkbox"/> Yes <input type="checkbox"/> No |
| • <b>Coughing</b>       | <input type="checkbox"/> Yes <input type="checkbox"/> No | • <b>Diarrhea</b>                        | <input type="checkbox"/> Yes <input type="checkbox"/> No |
| • <b>Headache</b>       | <input type="checkbox"/> Yes <input type="checkbox"/> No | • <b>Nausea/vomiting</b>                 | <input type="checkbox"/> Yes <input type="checkbox"/> No |
| • <b>Fatigue</b>        | <input type="checkbox"/> Yes <input type="checkbox"/> No | • <b>Dizziness</b>                       | <input type="checkbox"/> Yes <input type="checkbox"/> No |
| • <b>Muscle pain</b>    | <input type="checkbox"/> Yes <input type="checkbox"/> No | • <b>Chest pain/oppresion</b>            | <input type="checkbox"/> Yes <input type="checkbox"/> No |
| • <b>Sore throat</b>    | <input type="checkbox"/> Yes <input type="checkbox"/> No | • <b>Joint pain</b>                      | <input type="checkbox"/> Yes <input type="checkbox"/> No |
| • <b>Conjunctivitis</b> | <input type="checkbox"/> Yes <input type="checkbox"/> No | • <b>Skin rash</b>                       | <input type="checkbox"/> Yes <input type="checkbox"/> No |
| • <b>Laryngitis</b>     | <input type="checkbox"/> Yes <input type="checkbox"/> No | • <b>Other...</b>                        | <input type="checkbox"/> Yes <input type="checkbox"/> No |
|                         |                                                          | <b>If the answer is yes, which one :</b> | .....                                                    |

**Si pas de perte d'odorat dépistée à la 1<sup>ère</sup> visite, reposez les questions suivantes :**

Since the last consultation, have you noticed the appearance of a problem with your sense of smell (do you have difficulty smelling odors?) ☐ Yes ☐ No

**Olfaction disorders**

|                                                                                                                                                                                                                                                                                                                                                                        |                                                                                                                                                                                                                                                  |
|------------------------------------------------------------------------------------------------------------------------------------------------------------------------------------------------------------------------------------------------------------------------------------------------------------------------------------------------------------------------|--------------------------------------------------------------------------------------------------------------------------------------------------------------------------------------------------------------------------------------------------|
| <b>If the answer is yes, when did it start?</b>                                                                                                                                                                                                                                                                                                                        | ____/____/____                                                                                                                                                                                                                                   |
| <u>Onset of the symptom</u><br>0 gradually 1 suddenly<br><b>Did the smell problems appear gradually or suddenly?</b>                                                                                                                                                                                                                                                   | <input type="checkbox"/> Gradually<br><input type="checkbox"/> Suddenly                                                                                                                                                                          |
| <u>Inaugural nature of the symptom</u><br>0 no 1 yes<br><b>Were the problems with your sense of smell the first of your symptoms in isolation?</b><br><b>If the answer is no, has it been:</b><br>- Concomitant with other symptoms?<br>- Preceded by classical symptoms of COVID-19 (fever >38°, cough?)<br>- Preceded by minor symptoms (fatigue, aches, headaches?) | <input type="checkbox"/> Yes <input type="checkbox"/> No<br><br><input type="checkbox"/> Yes <input type="checkbox"/> No<br><input type="checkbox"/> Yes <input type="checkbox"/> No<br><input type="checkbox"/> Yes <input type="checkbox"/> No |
| <u>Quantitative dysosmia</u><br>1 partial (= hyposmia) 2 total (= anosmia)<br><b>Is your loss of smell partial or total?</b>                                                                                                                                                                                                                                           | <input type="checkbox"/> Partial <input type="checkbox"/> Total                                                                                                                                                                                  |
| <u>Parosmia</u><br>0 no 1 yes<br><b>Did you ever perceive a smell that did not correspond to the olfactory stimulation? (For example, coffee smells like burnt rubber)</b>                                                                                                                                                                                             | <input type="checkbox"/> Yes <input type="checkbox"/> No                                                                                                                                                                                         |



|                                                                                                                                                                                                                                                                         |                                                                                                                                                                                                                                                                                                          |
|-------------------------------------------------------------------------------------------------------------------------------------------------------------------------------------------------------------------------------------------------------------------------|----------------------------------------------------------------------------------------------------------------------------------------------------------------------------------------------------------------------------------------------------------------------------------------------------------|
| <u>Phantosmia</u><br>0 no                      1 yes<br><b>Have you ever perceived a smell without any olfactory stimulation?</b>                                                                                                                                       | <input type="checkbox"/> Yes <input type="checkbox"/> No                                                                                                                                                                                                                                                 |
| <b>Can you accurately smell the scent of :</b><br>0 no                      1 yes<br><ul style="list-style-type: none"> <li>• <b>Cinnamon ?</b></li> <li>• <b>Cumin ?</b></li> <li>• <b>Cloves ?</b></li> <li>• <b>Vanilla ?</b></li> <li>• <b>Vinegar ?</b></li> </ul> | <input type="checkbox"/> Yes <input type="checkbox"/> No<br><input type="checkbox"/> Yes <input type="checkbox"/> No |

### Evolution of the olfaction disorder

How long has your loss of smell been evolving in days ?.....

### Rhinological symptoms

|                                                                                                                                                                                                                                        |                                                                                                                                                                                                                                                  |
|----------------------------------------------------------------------------------------------------------------------------------------------------------------------------------------------------------------------------------------|--------------------------------------------------------------------------------------------------------------------------------------------------------------------------------------------------------------------------------------------------|
| <u>Rhinorrhea</u><br>If yes, concomitant to the smell disorder?<br>0 no                      1 yes<br><b>Did you have a runny nose?</b><br>0 no                      1 yes<br><b>If so, was it concomitant with the loss of smell?</b> | <input type="checkbox"/> Yes <input type="checkbox"/> No<br><input type="checkbox"/> Yes <input type="checkbox"/> No<br><input type="checkbox"/> Yes <input type="checkbox"/> No<br><br><input type="checkbox"/> Yes <input type="checkbox"/> No |
| <u>Nasal obstruction</u><br>0 no                      1 yes<br><b>Did you have the feeling that your nose was completely blocked?</b>                                                                                                  | <input type="checkbox"/> Yes <input type="checkbox"/> No                                                                                                                                                                                         |
| <u>Nasal hyperreactivity</u><br>0 no                      1 yes<br><b>Did you have an itchy nose with the urge to sneeze +/- sneezing?</b>                                                                                             | <input type="checkbox"/> Yes <input type="checkbox"/> No                                                                                                                                                                                         |
| <u>Nasal paresthesia (burning sensation, intranasal pain)</u><br><b>Did you experience a sensation of burning nose, tingling, pain?</b>                                                                                                | <input type="checkbox"/> Yes <input type="checkbox"/> No                                                                                                                                                                                         |
| <u>Other symptoms</u><br>0 no                      1 yes<br><b>Did you experience any other rhinologic symptoms?</b><br>If the answer is yes, which ones:                                                                              | <input type="checkbox"/> Yes <input type="checkbox"/> No<br>.....                                                                                                                                                                                |

### Taste disorder

|                                                                                                                                                                                                                                                                                                 |                                                                                                                                                                                      |
|-------------------------------------------------------------------------------------------------------------------------------------------------------------------------------------------------------------------------------------------------------------------------------------------------|--------------------------------------------------------------------------------------------------------------------------------------------------------------------------------------|
| <u>Dysgueusia</u><br>0 no                      1 yes<br><b>Did you experience a taste disorder?</b><br><b>If the answer is yes:</b><br><ul style="list-style-type: none"> <li>- <b>Was it about the flavors of the food?</b></li> <li>- <b>Was it about salty/sweet/bitter/sour?</b></li> </ul> | <input type="checkbox"/> Yes <input type="checkbox"/> No<br><br><input type="checkbox"/> Yes <input type="checkbox"/> No<br><input type="checkbox"/> Yes <input type="checkbox"/> No |
|-------------------------------------------------------------------------------------------------------------------------------------------------------------------------------------------------------------------------------------------------------------------------------------------------|--------------------------------------------------------------------------------------------------------------------------------------------------------------------------------------|

|                                                                                                                                                                                                                |                                                                                                                                                                                                                                              |
|----------------------------------------------------------------------------------------------------------------------------------------------------------------------------------------------------------------|----------------------------------------------------------------------------------------------------------------------------------------------------------------------------------------------------------------------------------------------|
| <b>Can you recognize:</b><br>0 no                      1 yes<br><ul style="list-style-type: none"> <li>• Salty taste ?</li> <li>• Sweet taste ?</li> <li>• Bitter taste ?</li> <li>• Acidic taste ?</li> </ul> | <input type="checkbox"/> Yes <input type="checkbox"/> No<br><input type="checkbox"/> Yes <input type="checkbox"/> No<br><input type="checkbox"/> Yes <input type="checkbox"/> No<br><input type="checkbox"/> Yes <input type="checkbox"/> No |
|----------------------------------------------------------------------------------------------------------------------------------------------------------------------------------------------------------------|----------------------------------------------------------------------------------------------------------------------------------------------------------------------------------------------------------------------------------------------|

### Other symptoms of COVID-19

Did you experience: ....? 0 no                      1 yes

|                                                                                                                                                                                                                    |                                                                                                                                                                                                                                                                                                                                                                                                                                                                                              |                                                                                                                                                                                                                                                         |                                                                                                                                                                                                                                                                                                                                                                                                                                                                                              |
|--------------------------------------------------------------------------------------------------------------------------------------------------------------------------------------------------------------------|----------------------------------------------------------------------------------------------------------------------------------------------------------------------------------------------------------------------------------------------------------------------------------------------------------------------------------------------------------------------------------------------------------------------------------------------------------------------------------------------|---------------------------------------------------------------------------------------------------------------------------------------------------------------------------------------------------------------------------------------------------------|----------------------------------------------------------------------------------------------------------------------------------------------------------------------------------------------------------------------------------------------------------------------------------------------------------------------------------------------------------------------------------------------------------------------------------------------------------------------------------------------|
| <ul style="list-style-type: none"> <li>• Fever</li> <li>• Coughing</li> <li>• Headache</li> <li>• Fatigue</li> <li>• Muscle pain</li> <li>• Sore throat</li> <li>• Conjunctivitis</li> <li>• Laryngitis</li> </ul> | <input type="checkbox"/> Yes <input type="checkbox"/> No<br><input type="checkbox"/> Yes <input type="checkbox"/> No | <ul style="list-style-type: none"> <li>• Difficulty breathing (dyspnea?)</li> <li>• Diarrhea</li> <li>• Nausea/vomiting</li> <li>• Dizziness</li> <li>• Chest pain/oppression</li> <li>• Joint pain</li> <li>• Skin rash</li> <li>• Other...</li> </ul> | <input type="checkbox"/> Yes <input type="checkbox"/> No<br><input type="checkbox"/> Yes <input type="checkbox"/> No |
| If the answer is yes, which one :                                                                                                                                                                                  |                                                                                                                                                                                                                                                                                                                                                                                                                                                                                              |                                                                                                                                                                                                                                                         | .....                                                                                                                                                                                                                                                                                                                                                                                                                                                                                        |

If loss of smell is detected at the first visit, ask the following questions:

### Treatment received for loss of smell / Rehabilitation

Have you received treatment for your loss of smell ? ☐ Yes ☐ No

If yes, which ones ? 0 non 1 oui

|                                                                                                                                                                                     | Oui / Non                                                                                                                                                                        | Si oui lequel ? | Si oui durée ? |
|-------------------------------------------------------------------------------------------------------------------------------------------------------------------------------------|----------------------------------------------------------------------------------------------------------------------------------------------------------------------------------|-----------------|----------------|
| <b>Treatment with systemic corticosteroid therapy (oral) ?</b>                                                                                                                      | <input type="checkbox"/> Yes <input type="checkbox"/> No                                                                                                                         | ....            | .....          |
| <b>Local treatment ?</b> <ul style="list-style-type: none"> <li>• Nose washes with saline solution</li> <li>• Local corticosteroid therapy</li> <li>• Other treatments ?</li> </ul> | <input type="checkbox"/> Yes <input type="checkbox"/> No<br><input type="checkbox"/> Yes <input type="checkbox"/> No<br><input type="checkbox"/> Yes <input type="checkbox"/> No | ....            | .....          |
| <b>Anti-COVID treatment (plaquenil, zithromax , autre antiviral)</b>                                                                                                                | <input type="checkbox"/> Yes <input type="checkbox"/> No                                                                                                                         | ....            | .....          |

- Have you done olfactory rehabilitation? ☐ Yes ☐ No
- If yes, for how long in days : .....

**Evaluation of olfactory recovery if disorder already described initially**

- **How far are we from the beginning of the disorder of the sense of smell (in days) ? : .....**

- **To date, have you recovered in terms of olfaction?** ☐ Yes ☐ No

**If so, in your opinion, have you recovered partially or totally?** ☐ Partially ☐ Totally  
0 partially 1 totally

**If so, how would you rate your recovery on a scale of 0 to 10**  
(10= complete recovery) ?.....

- **Have you ever perceived a smell that did not correspond to the olfactory stimulation (parosmia)?**

☐ Yes ☐ No

- **Have you ever perceived a smell without any olfactory stimulation (phantosmia)?**

☐ Yes ☐ No

- **How long did it take for your smell to recover in days?**

| [0-5[ days | [5-10[ days | [10-15[ days | [15-30[ days | More than a month |
|------------|-------------|--------------|--------------|-------------------|
|            |             |              |              |                   |
